# Supplementary material for: Simultaneous Determination of One-Carbon Folate Metabolites and One-Carbon-Related Amino Acids in Biological Samples Using a UHPLC–MS/MS Method
Source: MDPI journal article supplement (doi:10.3390/ijms25063458), 2024-03-19
Supplement: s1 [file s1]

Supplementary Table S2. Detection and quantitation limits of folate metabolites in the literature.

| Folate                | Sample source | LOD(nmol/L) | LLOQ(nmol/L) | literatures |
|-----------------------|---------------|-------------|--------------|-------------|
| 5-CH <sub>3</sub> THF | human plasma  | 1.51        | 4.51         | [39]        |
| FA                    | whole blood   | -           | 2.27         | [40]        |
| THF                   |               | 0.23        | 1.12         |             |
| 510-CH+THF            |               | 0.22        | 1.10         |             |
| 5-CHOTHF              |               | 0.32        | 1.06         |             |
| 5-CH <sub>3</sub> THF |               | 0.22        | 1.09         |             |
| DHF                   |               | -           | -            |             |
| 5-CH <sub>3</sub> THF | plasma        | 6.00        | 8.00         | [45]        |
| Hcy                   |               | 0.50        | 1.00         |             |
| Cys                   |               | 0.50        | 1.00         |             |
| Met                   |               | 2.00        | 3.00         |             |
| 5-CH <sub>3</sub> THF | plasma        | 2.20        | 6.30         | [46]        |
| 5-CH <sub>3</sub> THF | plasma        | 1.00        | 3.00         | [31]        |
| FA                    |               | 1.00        | 3.00         |             |
| THF                   |               | 0.99        | 2.30         |             |
| 510-CH+THF            |               | 3.01        | 15.00        |             |
