# Supplementary material for: Simultaneous Determination of One-Carbon Folate Metabolites and One-Carbon-Related Amino Acids in Biological Samples Using a UHPLC–MS/MS Method
Source: MDPI journal article supplement (doi:10.3390/ijms25063458), 2024-03-19
Supplement: s1 [file s1]

**Supplementary Table S3.** Folate standards used in this study.

|    | Standard                                                   | Abbreviated name            | Formula                                                           |                                                                     |
|----|------------------------------------------------------------|-----------------------------|-------------------------------------------------------------------|---------------------------------------------------------------------|
| 1  | (6R,S)-5-methyl-5,6,7,8-tetrahydrofolic acid, calcium salt | 5-CH <sub>3</sub> -Glu.Ca   | C <sub>20</sub> H <sub>25</sub> N <sub>7</sub> O <sub>6</sub> .Ca | Schircks<br>Laboratories<br>MYM biological<br>technology<br>company |
| 2  | Folic acid                                                 | FA                          | C <sub>19</sub> H <sub>19</sub> N <sub>7</sub> O <sub>6</sub>     | Schircks<br>Laboratories                                            |
| 3  | (6R,S)-5,10-methenyl-5,6,7,8-tetrahydrofolic acid chloride | 5,10-CH <sup>+</sup> THF.Cl | C <sub>20</sub> H <sub>22</sub> N <sub>7</sub> O <sub>6</sub> .Cl | Schircks<br>Laboratories                                            |
| 4  | 10-formylfolic acid                                        | 10-CHOFA                    | C <sub>20</sub> H <sub>19</sub> N <sub>7</sub> O <sub>7</sub>     | Schircks<br>Laboratories                                            |
| 5  | (6R,S)-5-formyl-5,6,7,8-tetrahydrofolic acid, calcium salt | 5-CHOTHF.Ca                 | C <sub>20</sub> H <sub>23</sub> N <sub>7</sub> O <sub>7</sub>     | Schircks<br>Laboratories                                            |
| 6  | (6S)-5,6,7,8-tetrahydrofolic acid                          | THF                         | C <sub>19</sub> H <sub>23</sub> N <sub>7</sub> O <sub>6</sub>     | Schircks<br>Laboratories                                            |
| 7  | <i>P</i> -Aminobenzoyl-L-glutamic acid                     | pABG                        |                                                                   | Schircks<br>Laboratories                                            |
| 8  | DL-homocysteine                                            | HCY                         | C <sub>4</sub> H <sub>9</sub> NO <sub>2</sub> S                   | Sigma                                                               |
| 9  | S-adenosyl-L-methionine                                    | SAM                         | C <sub>15</sub> H <sub>22</sub> N <sub>6</sub> O <sub>5</sub> S   | Sigma                                                               |
| 10 | L-Methionine                                               | Met                         | C <sub>5</sub> H <sub>11</sub> NO <sub>2</sub> S                  | Sigma                                                               |
| 11 | S-(5'-Adenosyl)-L-homocysteine                             | SAH                         | C <sub>14</sub> H <sub>20</sub> N <sub>6</sub> O <sub>5</sub> S   | Sigma                                                               |
| 12 | L-Theanine                                                 | Thea                        | C <sub>7</sub> H <sub>14</sub> N <sub>2</sub> O <sub>3</sub>      | Sigma                                                               |
| 13 | Methotrexate                                               | MTX                         | C <sub>20</sub> H <sub>22</sub> N <sub>8</sub> O <sub>5</sub>     | Ark Pharm                                                           |
