# Supplementary material for: Simultaneous Determination of One-Carbon Folate Metabolites and One-Carbon-Related Amino Acids in Biological Samples Using a UHPLC–MS/MS Method
Source: MDPI journal article supplement (doi:10.3390/ijms25063458), 2024-03-19
Supplement: s1 [file s1]

Supplementary Table S1. Some of the folate species measured in the literatures.

| Folate species                                       | Sample source                                                                                       | literatures |
|------------------------------------------------------|-----------------------------------------------------------------------------------------------------|-------------|
| 5-CHOTHF                                             | human serum                                                                                         | [39]        |
| 5-CH <sub>3</sub> THF                                |                                                                                                     |             |
| FA                                                   |                                                                                                     |             |
| 5-CH <sub>3</sub> THF                                | human plasma                                                                                        | [40]        |
| 5-CH <sub>3</sub> THF                                | human serum                                                                                         | [41]        |
| FA                                                   |                                                                                                     |             |
| Hcy                                                  |                                                                                                     |             |
| 5-CH <sub>3</sub> THF                                | human serum                                                                                         | [42]        |
| THF                                                  |                                                                                                     |             |
| 5fTHF                                                |                                                                                                     |             |
| 510-CH+THF                                           |                                                                                                     |             |
| 4- $\alpha$ -hydroxy-5-methyltetrahydrofolate(MeFox) |                                                                                                     |             |
| 5-CH <sub>3</sub> THF                                | human plasma                                                                                        | [43]        |
| DHF                                                  |                                                                                                     |             |
| THF                                                  |                                                                                                     |             |
| FA                                                   |                                                                                                     |             |
| 5-CH <sub>3</sub> THF                                | mouse bone marrow cells and plasma, human whole blood, mouse muscle, liver, heart and brain samples | [44]        |
| DHF                                                  |                                                                                                     |             |
| THF                                                  |                                                                                                     |             |
| FA                                                   |                                                                                                     |             |
| 510-CH+THF                                           |                                                                                                     |             |
| 5-CHOTHF                                             |                                                                                                     |             |
